# Supplementary material for: Metabolic reprogramming via an engineered PGC-1α improves human chimeric antigen receptor T-cell therapy against solid tumors
Source: PubMed Central journal article supplement — J Immunother Cancer. 2023 Mar 13;11(3):e006522. doi: 10.1136/jitc-2022-006522 (PMC10016249; doi:10.1136/jitc-2022-006522), 2023-03-13
Supplement: jitc-2022-006522supp001.pdf [file jitc-2022-006522supp001.pdf]

## Appendix

>EGFR.CAR scFv (vL-Linker-vH)

```
CAAATCCTGCTCACTCAGAGCCCGGTGATTTTGTCCGTCTCCCCGGCGAGCGCGTATCATTTTCATGTA
GGGCTTCTCAGAGCATCGGCACCAATATTCACTGGTATCAGCAGCGCACAAATGGCAGCCCAAGACTGC
TCATTAAGTATGCCTCAGAATCAATTTTCAGGCATCCCAAGCCGCTTCTCCGGCTCAGGCTCCGGGACCGA
CTTTACATTGAGCATTAACTCAGTGGAATCTGAAGACATCGCCGATTACTACTGTCAACAGAATAATAAC
TGGCCGACGACGTTTGGCGCCGGAATAACTGGAAGTGAAGGGGGGAGGGGGCTCTGGAGGTGGAG
GGTCCGGAGGAGGCGGGTCAAGTGCAGCTGAAGCAATCTGGACCTGGACTCGTTCAGCCTTCTCAG
AGCCTCTCCATCACTTGCAGTGAAGTGGCTTCTCACTGACCAACTATGGGGTGCAGTGGGTGAGACAGT
CCCCGGAAAGGGGCTGGAATGGCTCGGAGTTATTTGGAGCGGAGGAAATACGGACTACAACACCCCG
TTTACATCCAGACTCTCCATAAATAAGGATAACAGCAAAGCCAGGTGTTTTTTAAAATGAACAGCCTGC
AGAGCCAAGATACAGCTATCTATTATTGTGCGCGCGCACTGACATACTATGACTACGAGTTTGCATACTG
GGCCAAGGGACCCTTGTACAGTCTCATCA
```
