# Supplementary material for: Metabolic reprogramming via an engineered PGC-1α improves human chimeric antigen receptor T-cell therapy against solid tumors
Source: PubMed Central journal article supplement — J Immunother Cancer. 2023 Mar 13;11(3):e006522. doi: 10.1136/jitc-2022-006522 (PMC10016249; doi:10.1136/jitc-2022-006522), 2023-03-13
Supplement: jitc-2022-006522supp002.pdf [file jitc-2022-006522supp002.pdf]

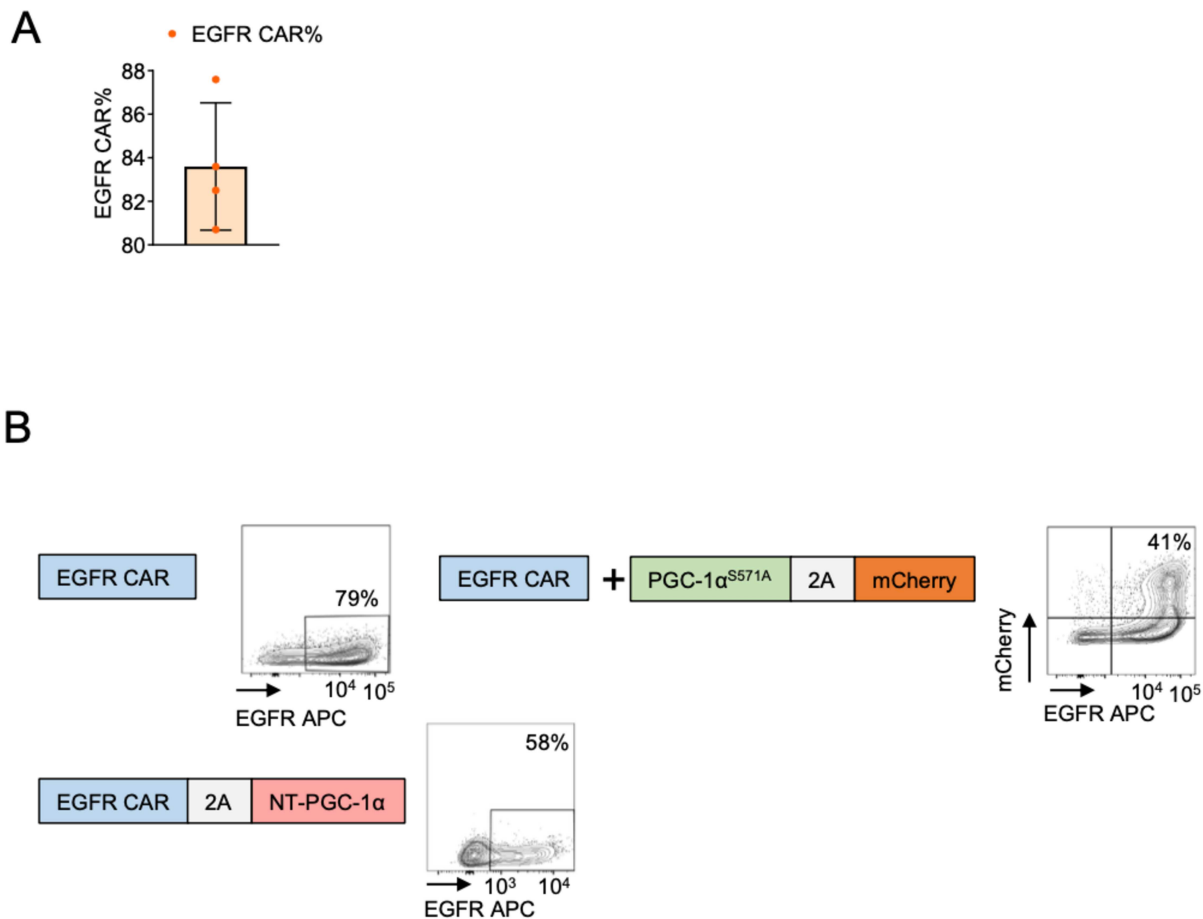

**Supp. Figure 1.** (A) CAR expression at the end of expansion before transduction into tumor bearing NSG mice (B) Vector schemes and transduction efficiency of CAR-T cells used in this study.
