# Supplementary material for: Metabolic reprogramming via an engineered PGC-1α improves human chimeric antigen receptor T-cell therapy against solid tumors
Source: PubMed Central journal article supplement — J Immunother Cancer. 2023 Mar 13;11(3):e006522. doi: 10.1136/jitc-2022-006522 (PMC10016249; doi:10.1136/jitc-2022-006522), 2023-03-13
Supplement: jitc-2022-006522supp003.pdf [file jitc-2022-006522supp003.pdf]

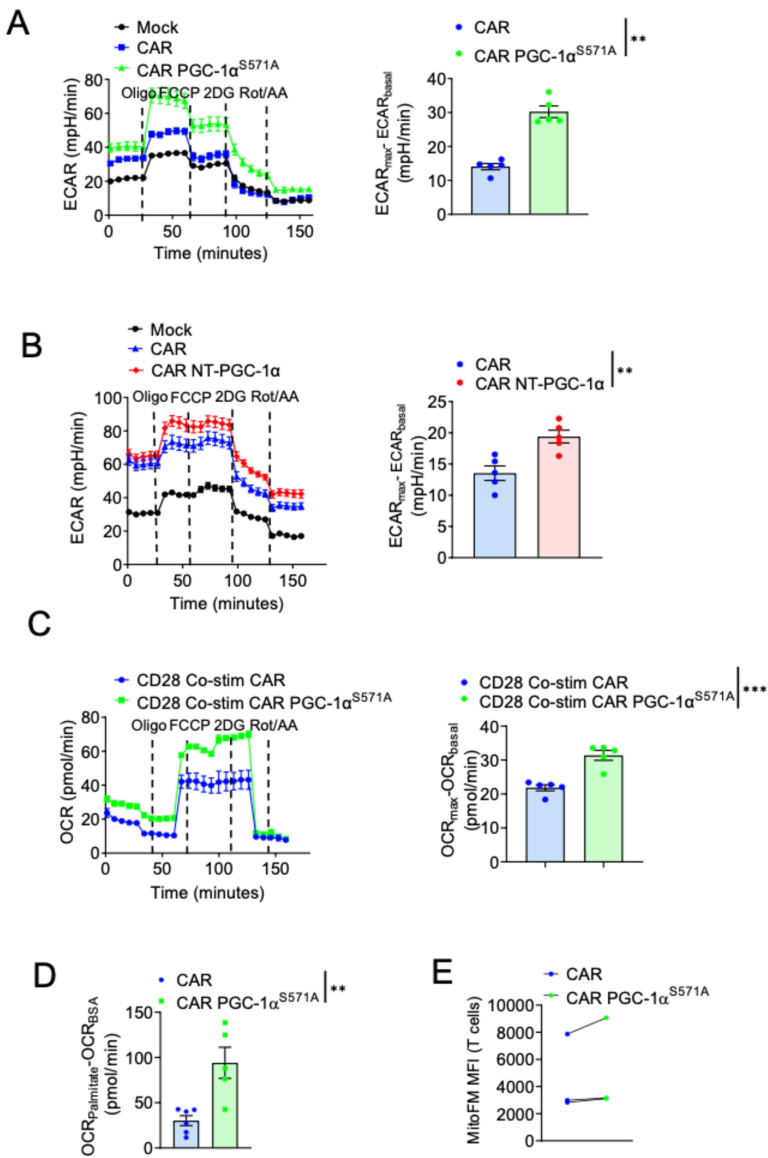

**Supp. Figure 2.** AKT-resistant form of PGC-1 $\alpha$  (A) and NT-PGC-1 $\alpha$  (B) increase the glycolytic capacity of human CAR T cells *in vitro*. (C) Overexpression of PGC-1 $\alpha^{S571A}$  was sufficient to induce enhanced respiratory capacity on a CAR-T cell with a CD28 co-stimulatory domain. (D) PGC-1 $\alpha^{S571A}$ -overexpressing CAR-T cells have a higher metabolic rate for fatty acids (specifically palmitate). (E) Overexpression of PGC-1 $\alpha^{S571A}$  retained the mitochondrial benefit even after 6 days of culture at 1.5% hypoxia.
