# Supplementary material for: Metabolic reprogramming via an engineered PGC-1α improves human chimeric antigen receptor T-cell therapy against solid tumors
Source: PubMed Central journal article supplement — J Immunother Cancer. 2023 Mar 13;11(3):e006522. doi: 10.1136/jitc-2022-006522 (PMC10016249; doi:10.1136/jitc-2022-006522), 2023-03-13
Supplement: jitc-2022-006522supp004.pdf [file jitc-2022-006522supp004.pdf]

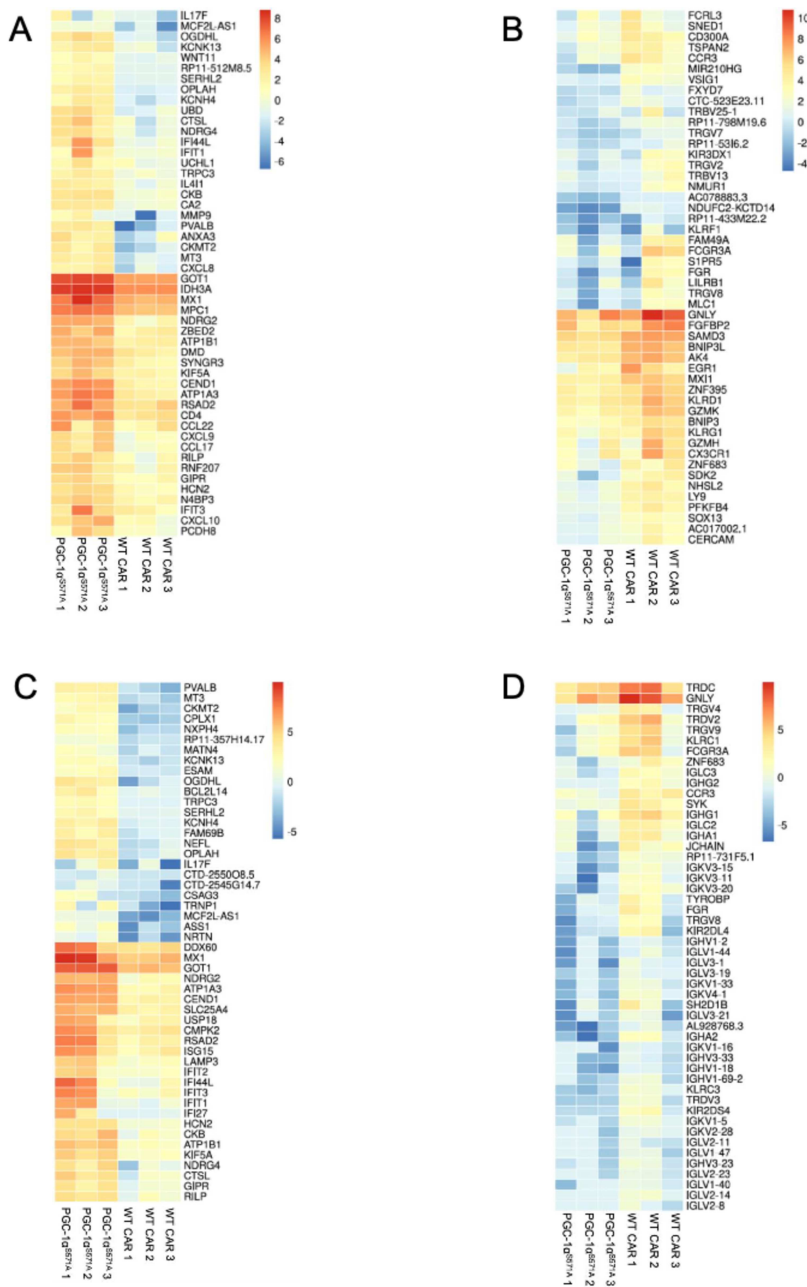

**Supp. Figure 3. Bulk RNA sequencing analysis.** (A) Top 50 genes with higher expression in CD8 PGC-1 $\alpha$ <sup>S571A</sup> CARs (B) Top 50 genes with lower expression in CD8 PGC-1 $\alpha$ <sup>S571A</sup> CARs (C) Top 50 genes with higher expression in CD4 PGC-1 $\alpha$ <sup>S571A</sup> CARs (D) Top 50 genes with lower expression in CD4 PGC-1 $\alpha$ <sup>S571A</sup> CARs.
