# Supplementary material for: Metabolic reprogramming via an engineered PGC-1α improves human chimeric antigen receptor T-cell therapy against solid tumors
Source: PubMed Central journal article supplement — J Immunother Cancer. 2023 Mar 13;11(3):e006522. doi: 10.1136/jitc-2022-006522 (PMC10016249; doi:10.1136/jitc-2022-006522), 2023-03-13
Supplement: jitc-2022-006522supp005.pdf [file jitc-2022-006522supp005.pdf]

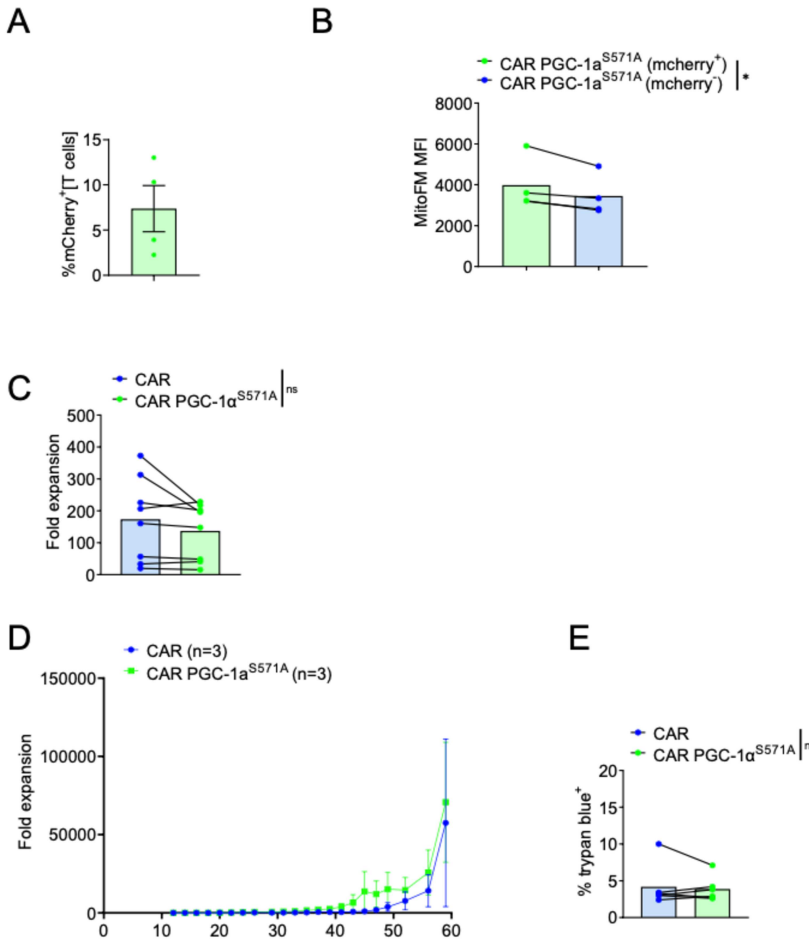

**Supp. Figure 4.** (A) Percent of mcherry<sup>+</sup> CAR-T cells in the tumor on day 10 post-infusion (B) MitotrackerFM staining of mcherry<sup>+</sup> versus mcherry<sup>-</sup> CAR-T cells within the same mouse. (C) Fold expansion at day 10 of expansion. (D) Long-term fold-expansion of PGC-1α<sup>S571A</sup> CARs versus WT CARs. (E) Trypan Blue<sup>+</sup> cells at day 10 of expansion.
